# Supplementary material for: A promising ultraviolet nonlinear optical crystal: Rb3Ba3Li2Al4B6O20F—crystal growth, physical properties, and 266 nm laser generation
Source: Royal Society of Chemistry journal article supplement (doi:10.1039/d2tc04914g), 2022-12-15
Supplement: d2tc04914g1.pdf [file d2tc04914g1.pdf]

## Supporting Information

### **A Promising Ultraviolet Nonlinear Optical Crystal: $\text{Rb}_3\text{Ba}_3\text{Li}_2\text{Al}_4\text{B}_6\text{O}_{20}\text{F}$ —Crystal Growth, Physical Properties and 266 nm Laser Generation**

*Jiankang Wang, Hongping Wu, Zhanggui Hu, Jiyang Wang, Yicheng Wu, Hongwei Yu\**

*Tianjin Key Laboratory of Functional Crystal Materials, Institute of Functional Crystals, Materials Science and Engineering, Tianjin University of Technology  
Tianjin 300384, China. E-mail: hwyu15@gmail.com*

#### **CONTENTS**

- 1. Table S1** (Experimental results of flux ratios)
- 2. Figure S1.** (The grown RBLABF crystal with [001]-oriented seed)
- 3. Figure S2.** (The XRD patterns of indexed planes for RBLABF crystal)
- 4. Figure S3.** (The temperature-dependent XRD patterns of RBLABF)
- 5. Equation S1.** (The NLO coefficient ( $d_{ij}$ ) matrix of RBLABF)

**Table S1.** Experimental results of flux ratios

| Molar ration<br>RBLABF:Li <sub>2</sub> CO <sub>3</sub> :BaF <sub>2</sub> :H <sub>3</sub> BO <sub>3</sub> | Crystal<br>morphology | Results                                          | Quality |
|----------------------------------------------------------------------------------------------------------|-----------------------|--------------------------------------------------|---------|
| 1:4:3:5                                                                                                  | parallelepiped        | RBLABF                                           | medium  |
| 1:4:2:5                                                                                                  | parallelepiped        | RBLABF                                           | medium  |
| 1:4:0:5                                                                                                  | Platelike             | LiBa <sub>2</sub> B <sub>5</sub> O <sub>10</sub> |         |
| Molar ration<br>RBLABF:LiBO <sub>2</sub> :BaF <sub>2</sub>                                               |                       |                                                  |         |
| 1:8:3                                                                                                    | Platelike             | RBLABF                                           | medium  |
| 1:8:1                                                                                                    | Platelike             | RBLABF                                           | medium  |
| 1:5.5:0.6                                                                                                | triangle              | RBLABF                                           | Good    |
| 1:3.5:0.6                                                                                                | triangle              | RBLABF                                           | Good    |

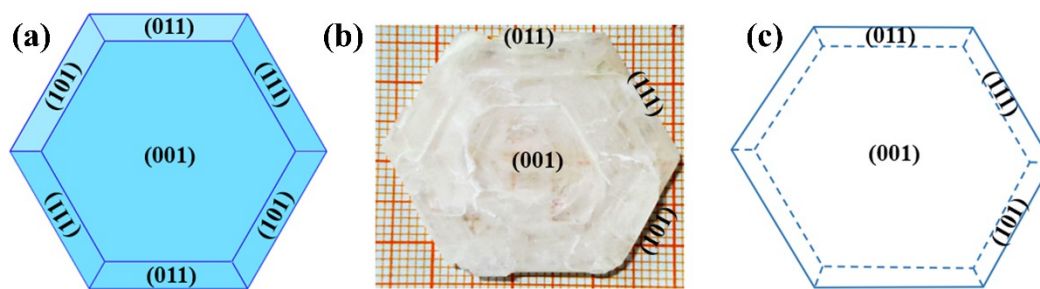

**Figure S1.** (a) The simulated morphology with  $\{001\}$  prominent faces; (b) the grown RBLABF crystal with  $[001]$ -oriented seed; (c) the morphology of RBLABF crystal with  $[001]$ -oriented seed;

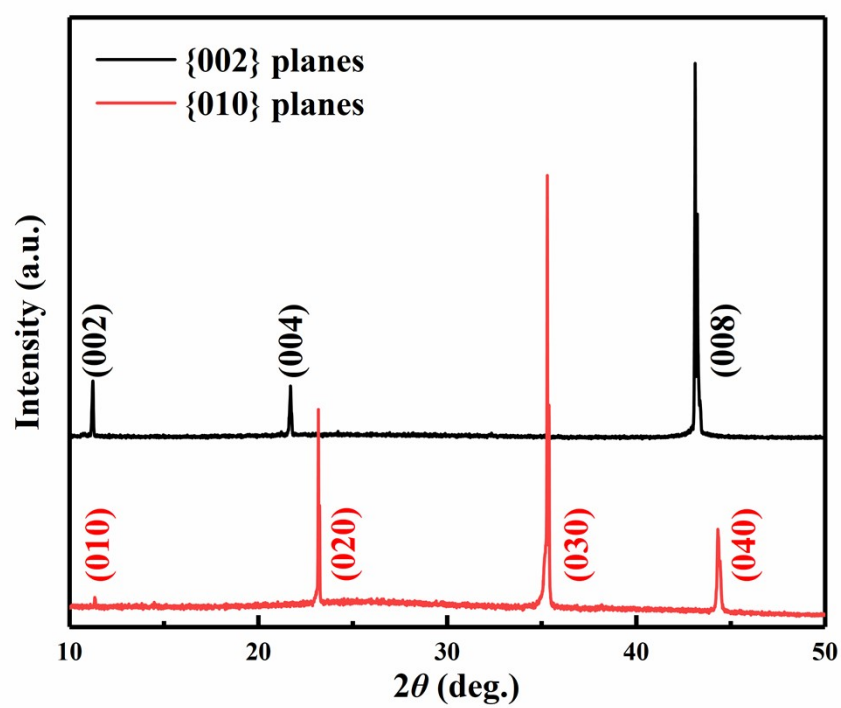

**Figure S2.** XRD patterns of {010} and {002} planes for RBLABF.

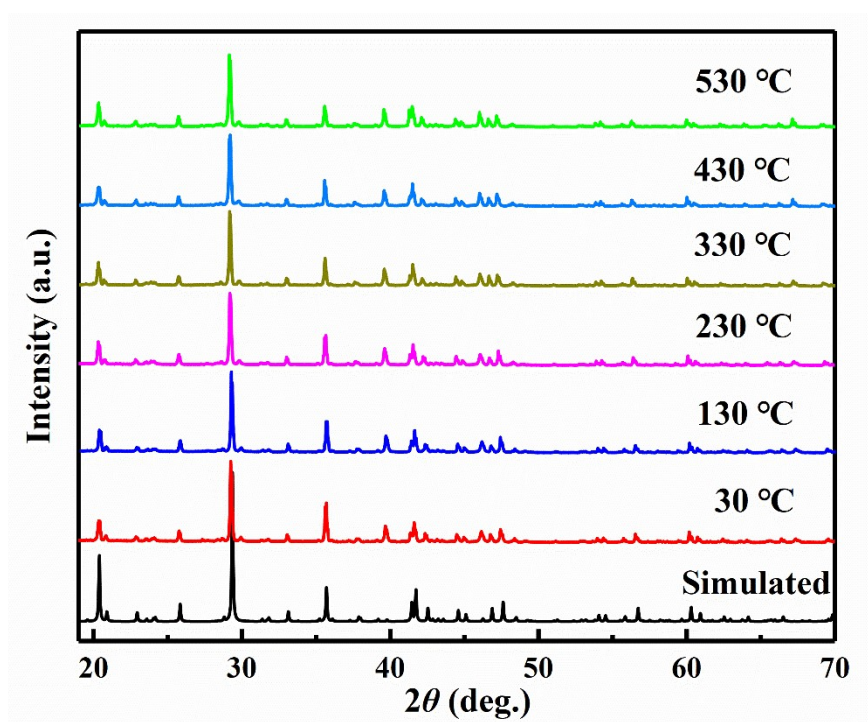

**Figure S3.** The temperature-dependent XRD patterns of RBLABF.

$$\begin{bmatrix} P_x^{(2\omega)} \\ P_y^{(2\omega)} \\ P_z^{(2\omega)} \end{bmatrix} = \begin{bmatrix} 0 & 0 & 0 & 0 & 0 & d_{22} \\ d_{22} & d_{22} & 0 & 0 & 0 & 0 \\ 0 & 0 & 0 & 0 & 0 & 0 \end{bmatrix} \cdot \begin{bmatrix} E_x^2 \\ E_y^2 \\ E_z^2 \\ 2E_yE_z \\ 2E_zE_x \\ 2E_xE_y \end{bmatrix} \quad \text{equation (1)}$$

**Equation S1.** The NLO coefficient ( $d_{ij}$ ) matrix of RBLABF.
